# Supplementary material for: A Meta-Analysis of the Characterisations of Plastic Ingested by Fish Globally
Source: MDPI journal article supplement (doi:10.3390/toxics10040186), 2022-04-11
Supplement: s1 [file s1]

# Supplementary Materials: A Meta-Analysis of the Characterisations of Plastic Ingested by Fish Globally

Kok Ping Lim, Phaik Eem Lim, Sumiani Yusoff, Chengjun Sun, Jinfeng Ding and Kar Hoe Loh

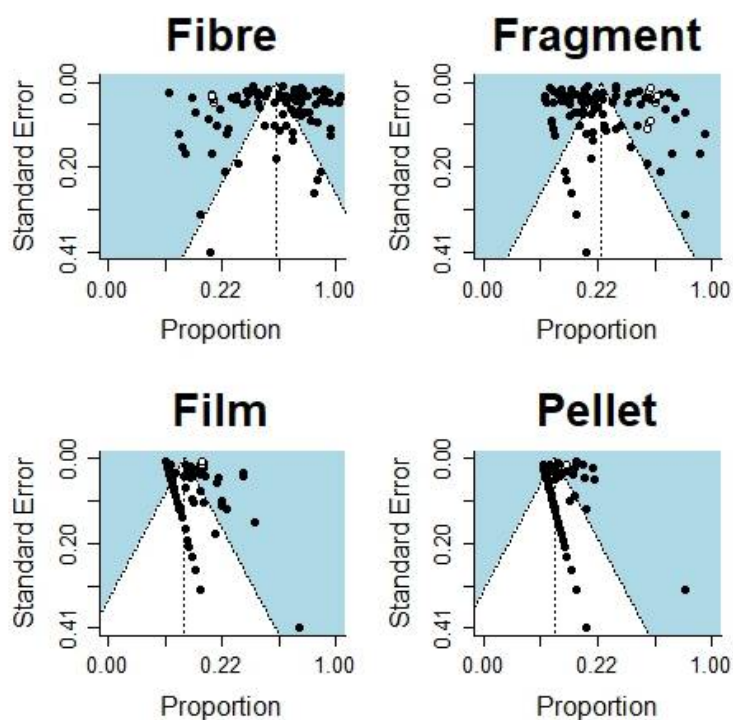

**Figure S1.** Funnel plot for the prevalence of plastic's shapes ingested by fish from all environments. Studies are represented by full circles and imputed studies are represented by empty circles.

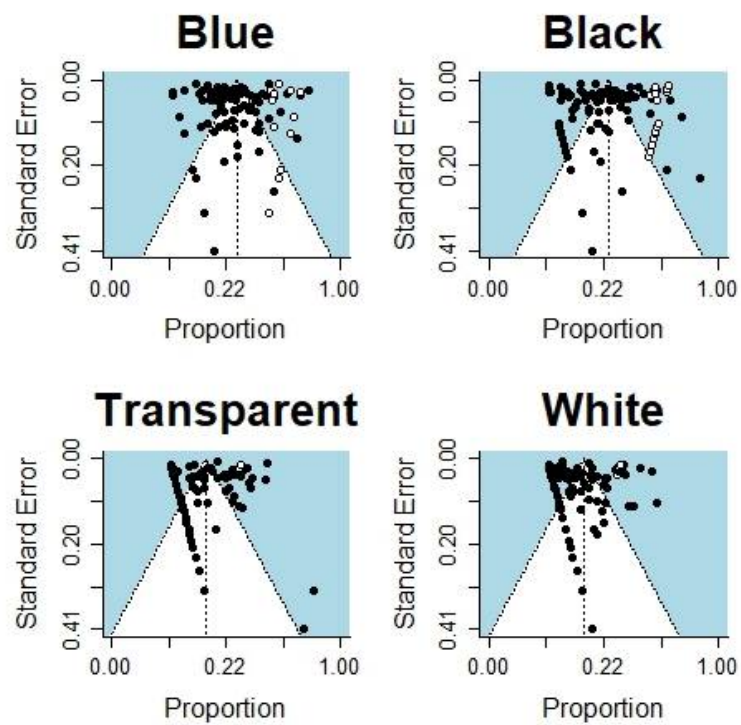

**Figure S2.** Funnel plot for the prevalence of plastic's colours ingested by fish from all environments. Studies are represented by full circles and imputed studies are represented by empty circles.

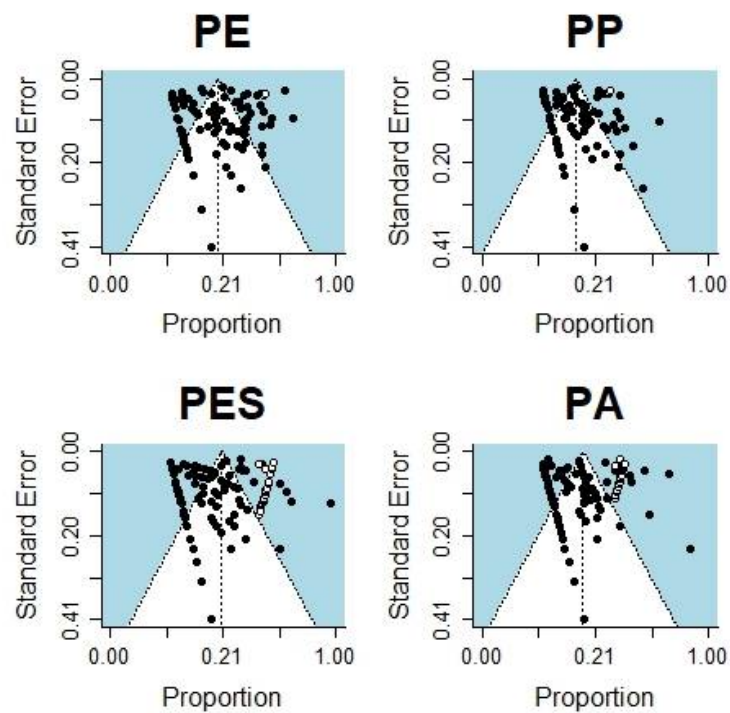

**Figure S3.** Funnel plot for the prevalence of plastic's polymer type ingested by fish from all environments. Studies are represented by full circles and imputed studies are represented by empty circles. PE: Polyethylene; PP: Polypropylene; PES: Polyester; PA: Polyamide; PS: Polystyrene.

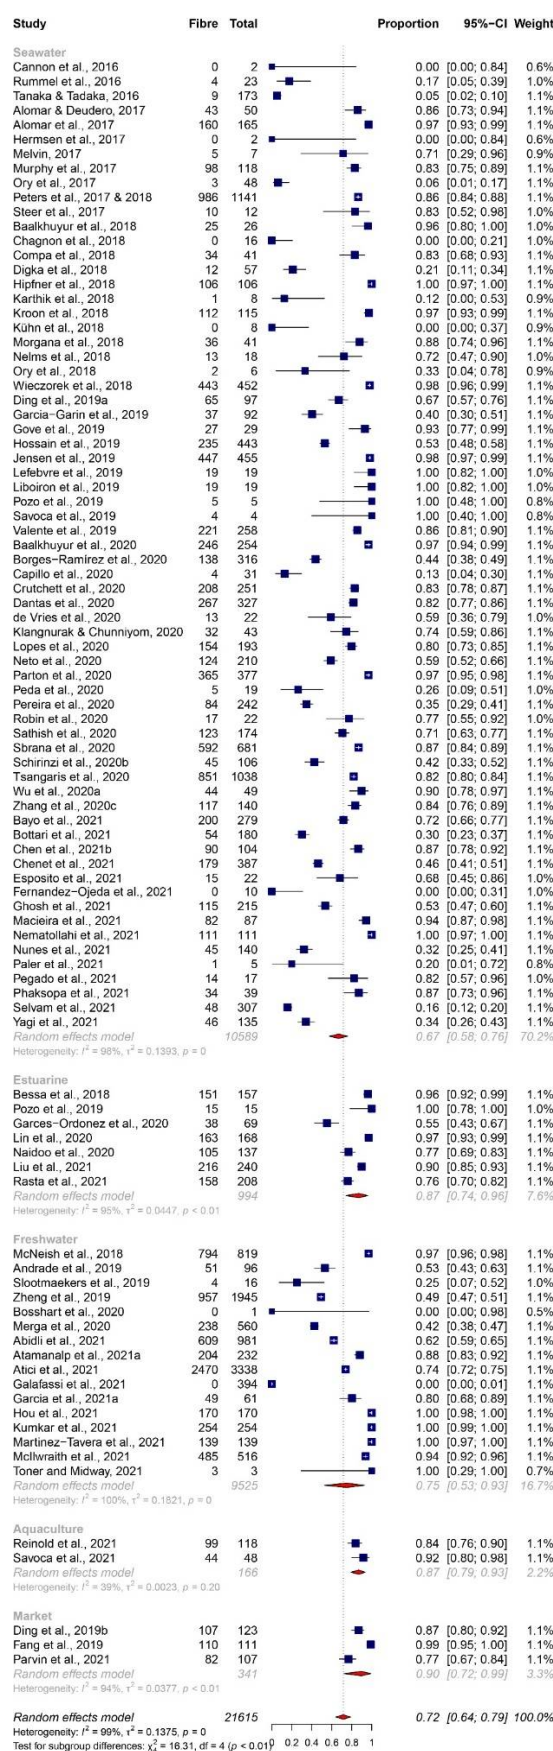

**Figure S4.** Forest plot for fibre subgroup analysis. Red diamonds represent subgroup means. Total: total plastics found in each study. Fibre: number of fibre found in each study.

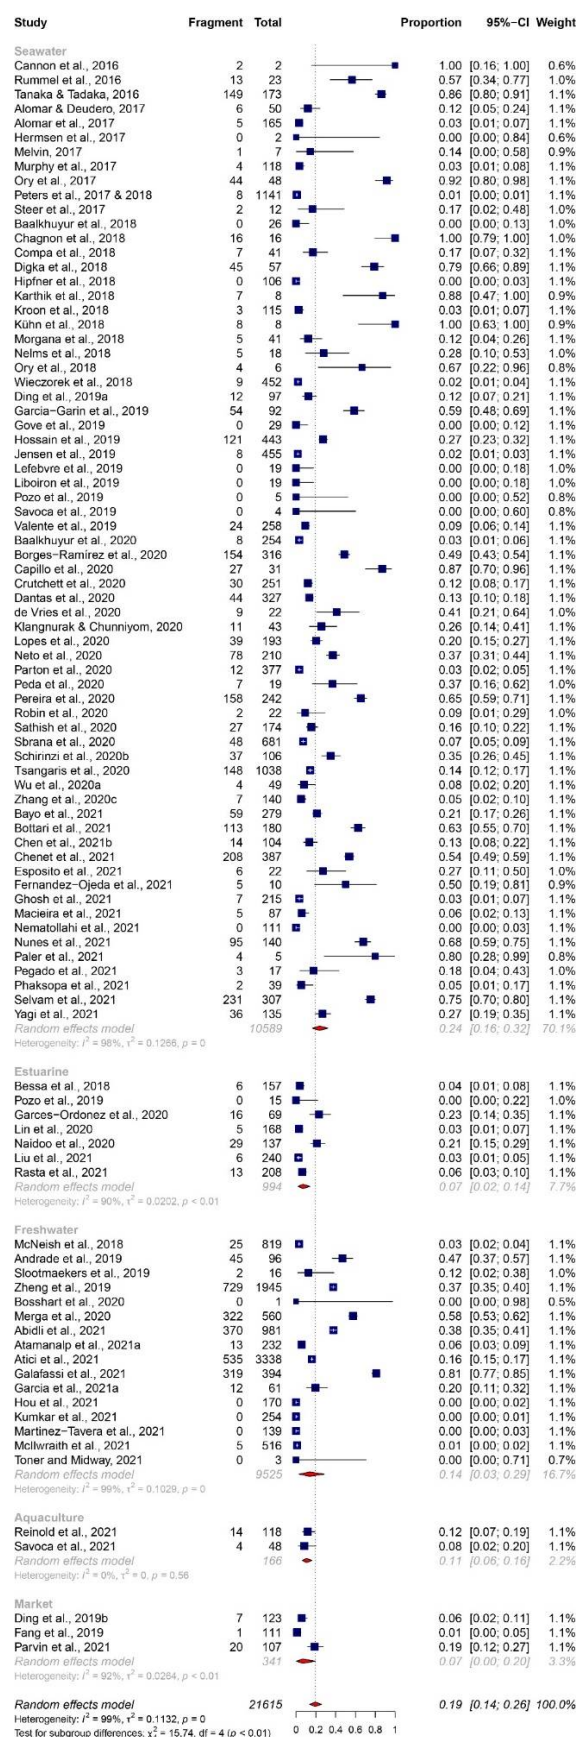

**Figure S5.** Forest plot for fragment subgroup analysis. Red diamonds represent subgroup means. Total: total plastics found in each study. Fragment: number of fragment found in each study.



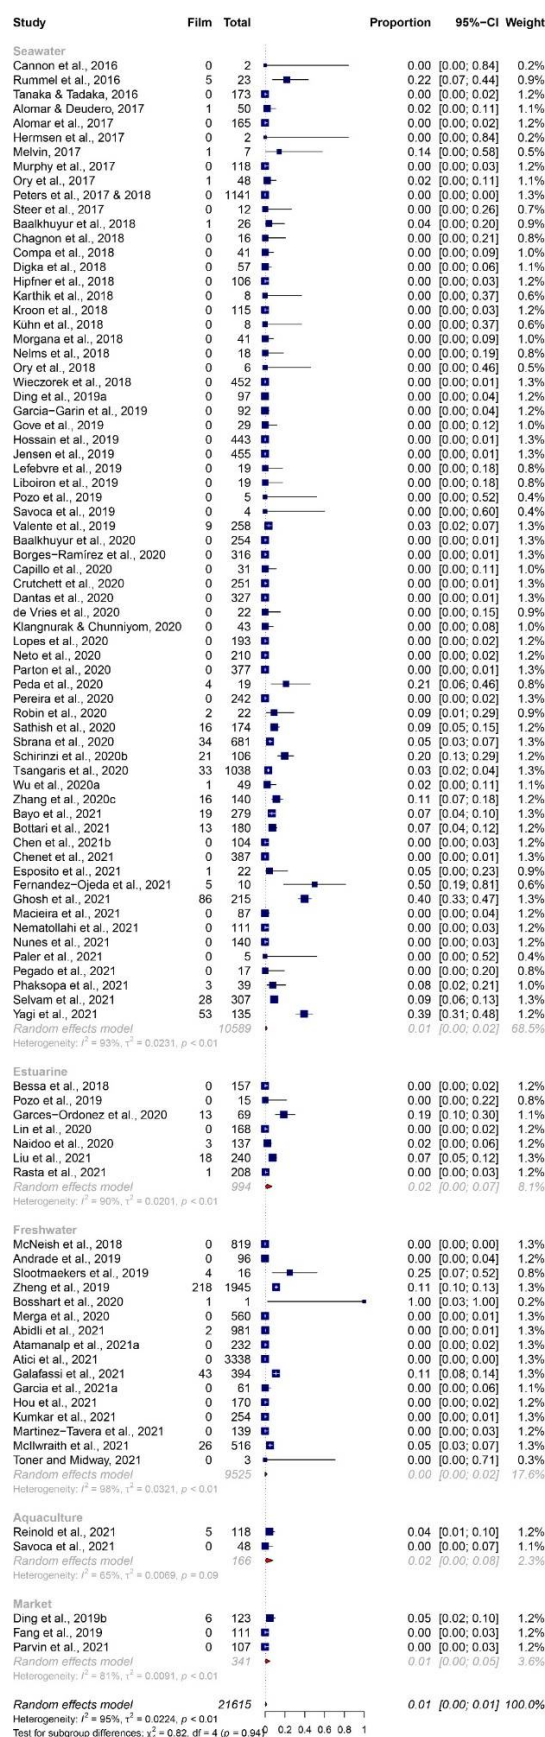

**Figure S6.** Forest plot for film subgroup analysis. Red diamonds represent subgroup means. Total: total plastics found in each study. Film: number of film found in each study.

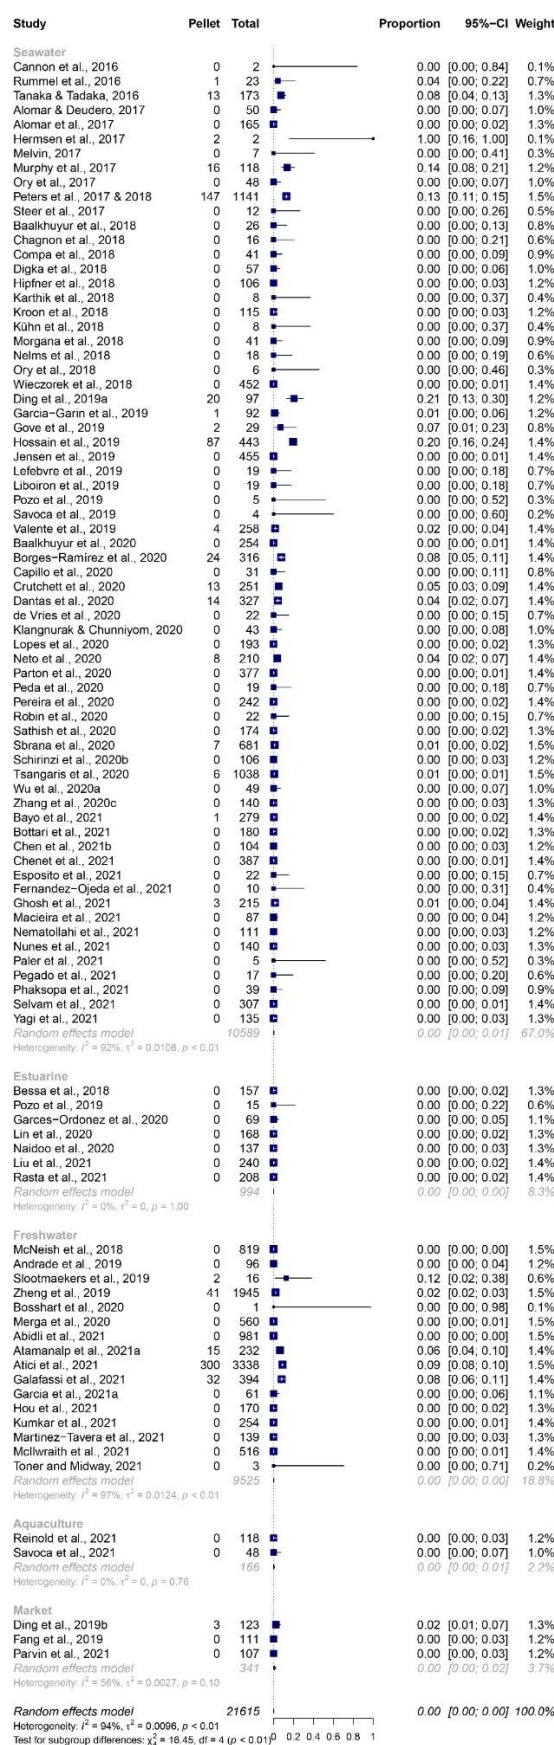

**Figure S7.** Forest plot for pellet subgroup analysis. Red diamonds represent subgroup means. Total: total plastics found in each study. Pellet: number of pellet found in each study.

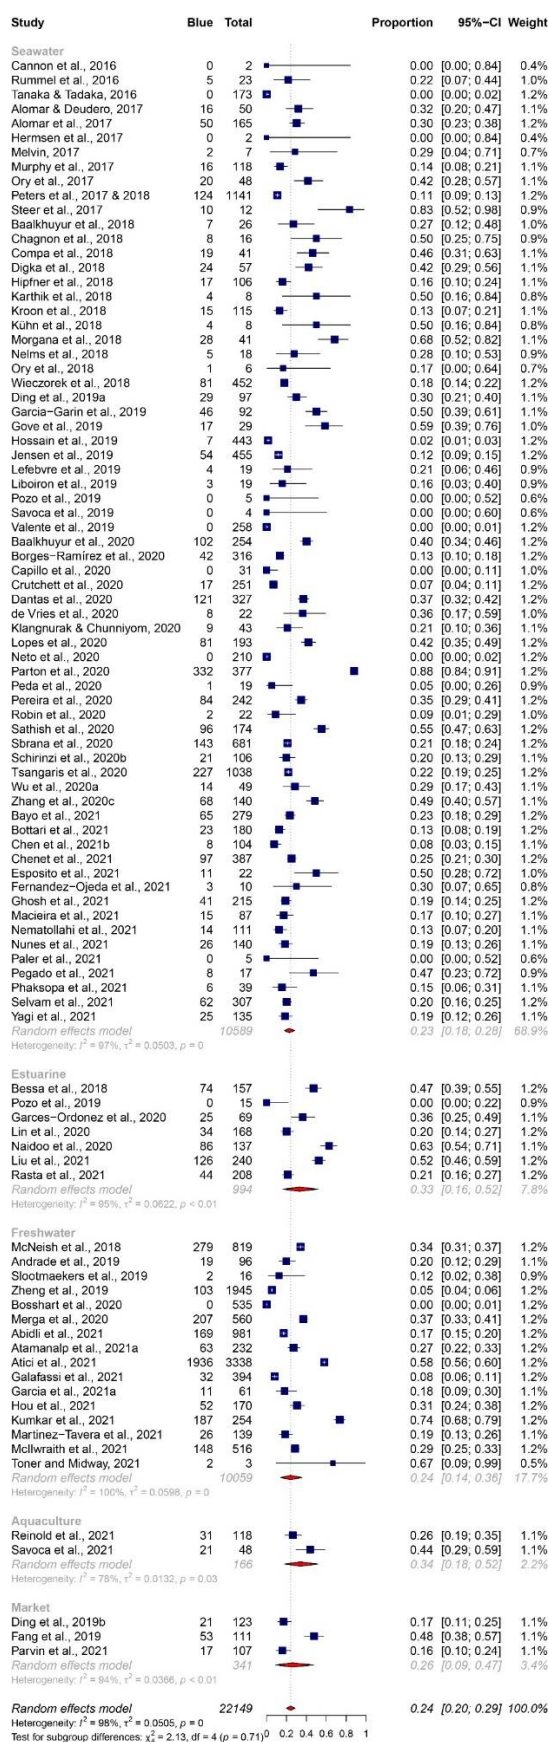

**Figure S8.** Forest plot for blue subgroup analysis. Red diamonds represent subgroup means. Total: total plastics found in each study. Blue: number of blue found in each study.



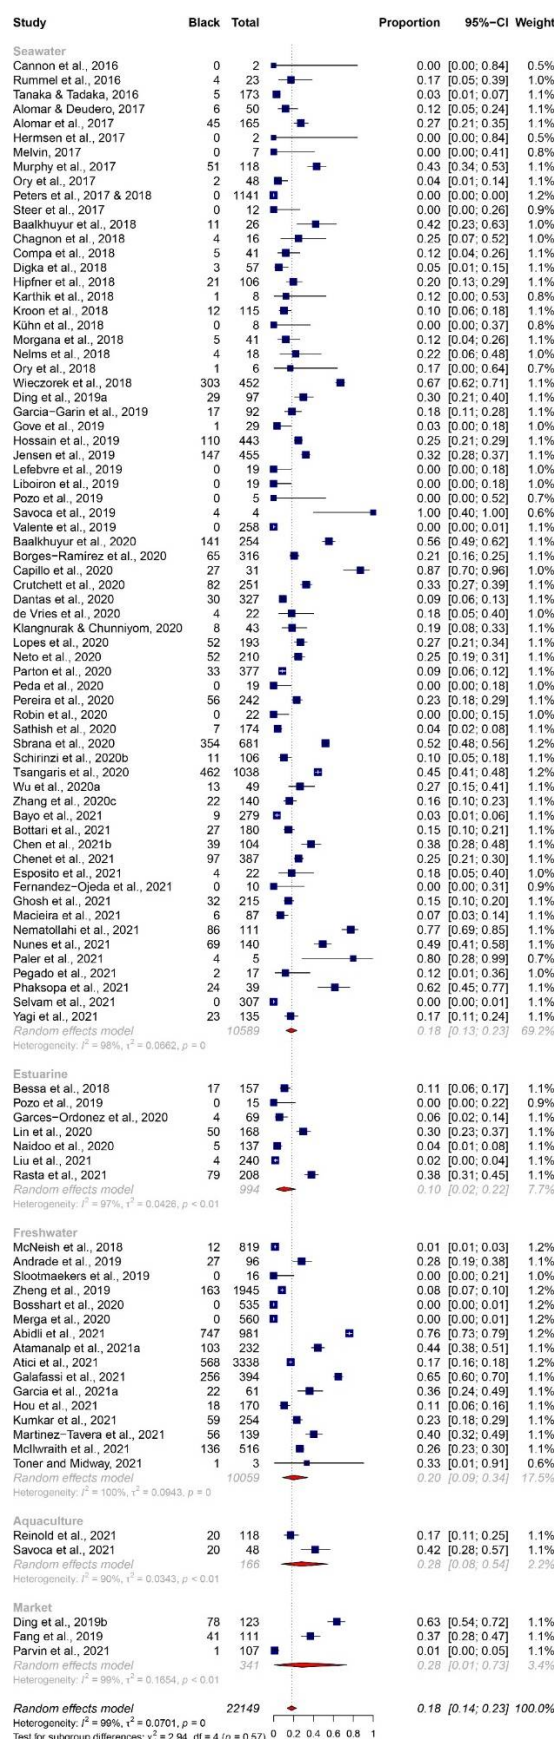

**Figure S9.** Forest plot for black subgroup analysis. Red diamonds represent subgroup means. Total: total plastics found in each study. Black: number of black found in each study.

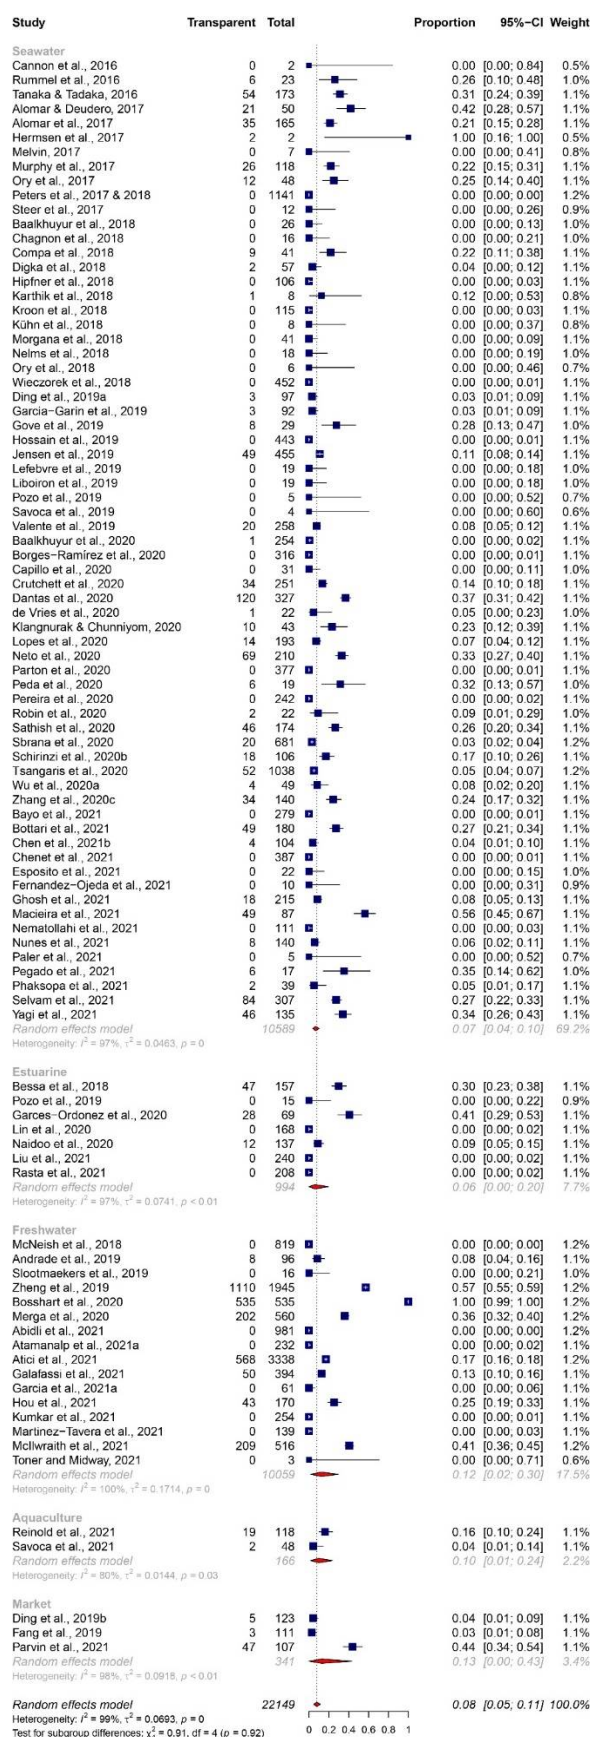

**Figure S10.** Forest plot for transparent subgroup analysis. Red diamonds represent subgroup means. Total: total plastics found in each study. Transparent: number of transparent found in each study.

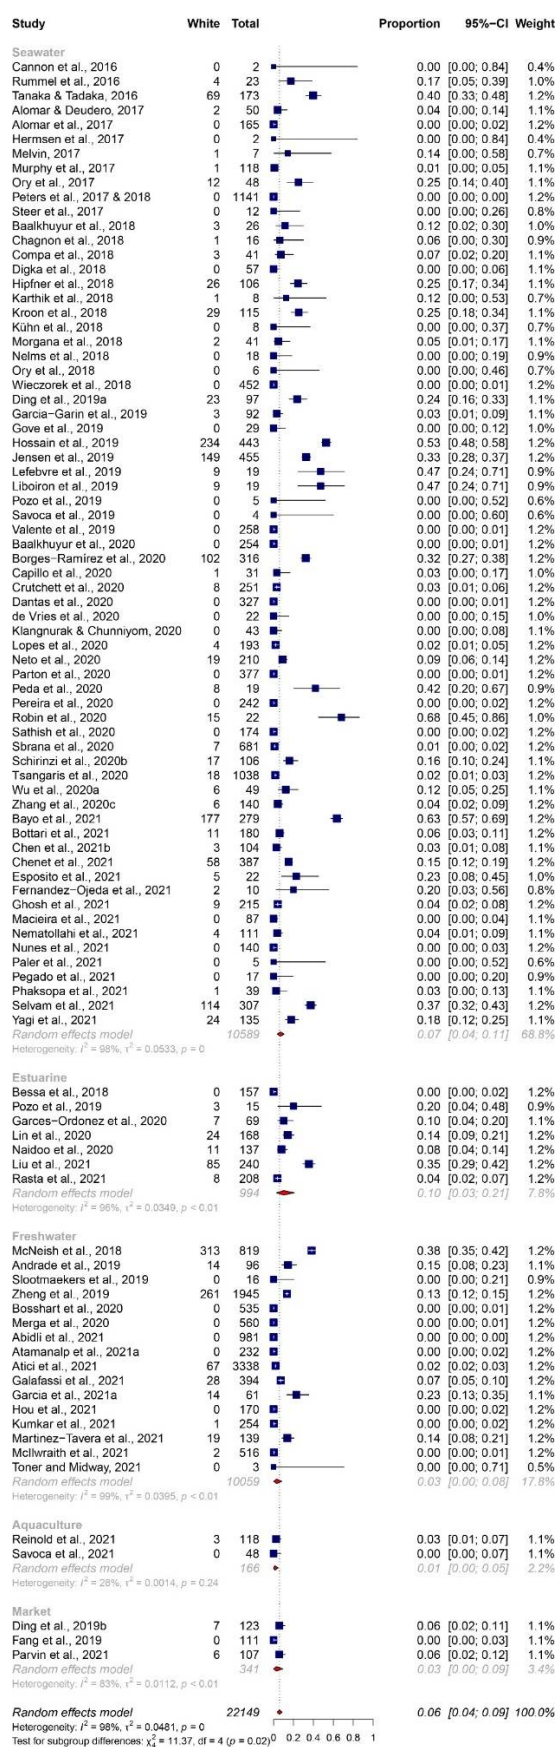

**Figure S11.** Forest plot for white subgroup analysis. Red diamonds represent subgroup means. Total: total plastics found in each study. White: number of white found in each study.



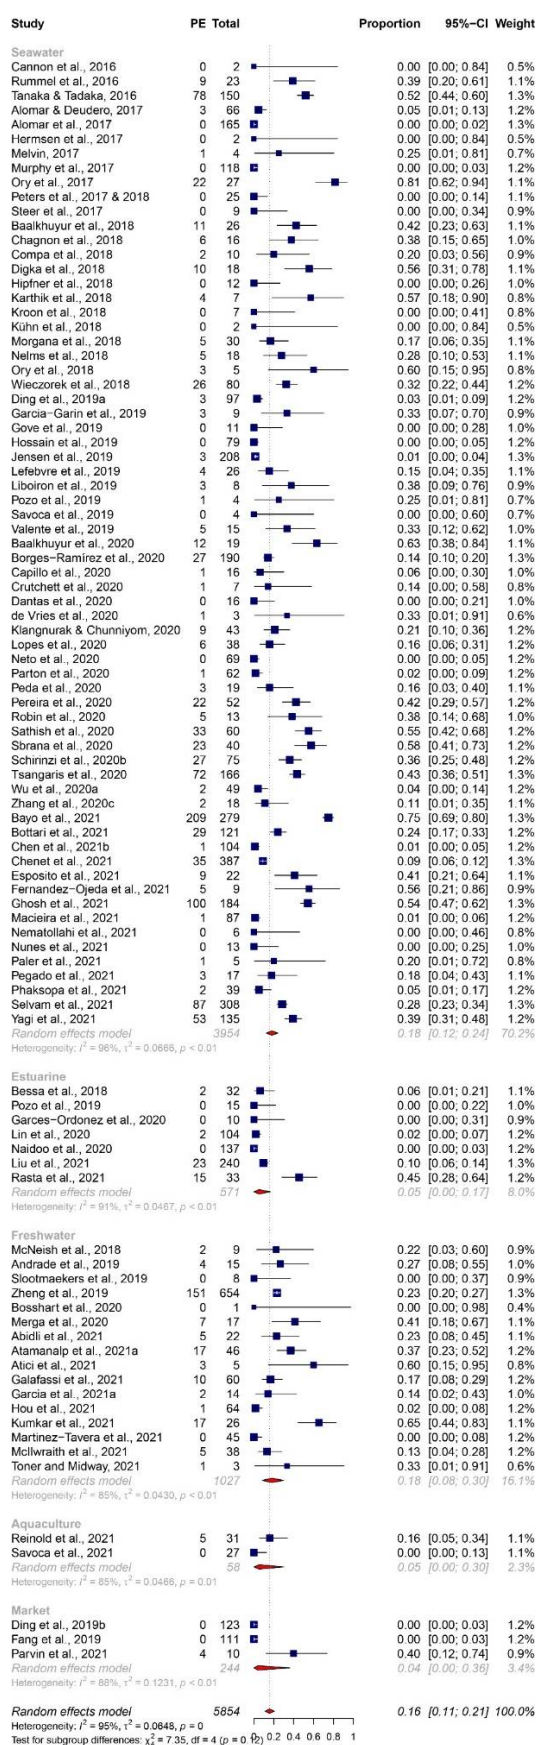

**Figure S12.** Forest plot for PE subgroup analysis. Red diamonds represent subgroup means. Total: total plastics found in each study. PE: number of PE found in each study. PE: Polyethylene.



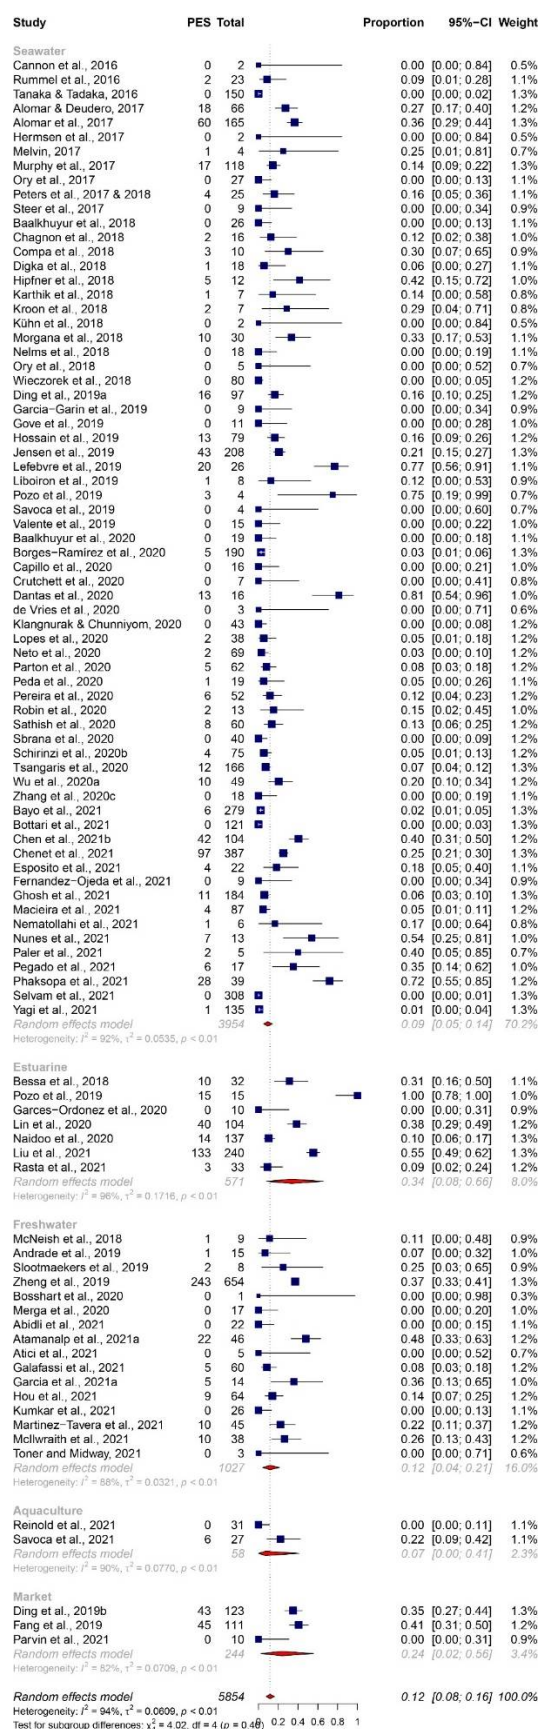

**Figure S13.** Forest plot for PES subgroup analysis. Red diamonds represent subgroup means. Total: total plastics found in each study. PES: number of PES found in each study. PES: Polyester.

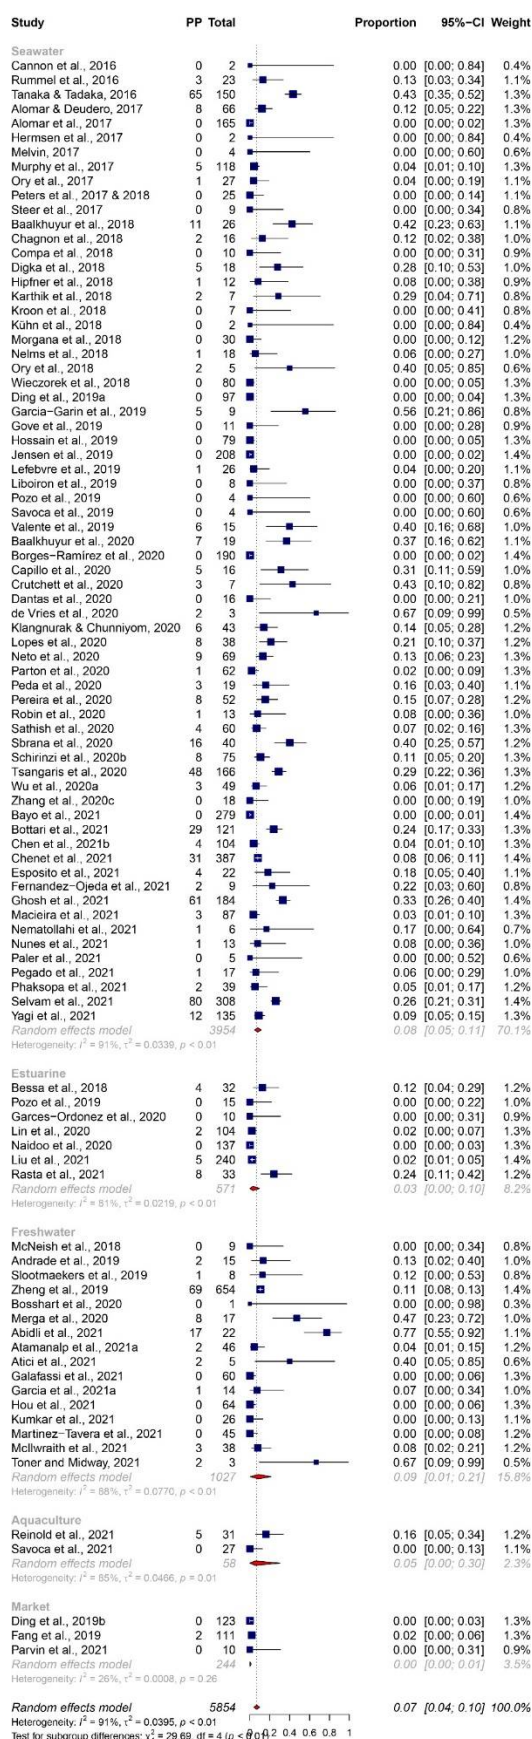

**Figure S14.** Forest plot for PP subgroup analysis. Red diamonds represent subgroup means. Total: total plastics found in each study. PP: number of PP found in each study. PP: Polypropylene.

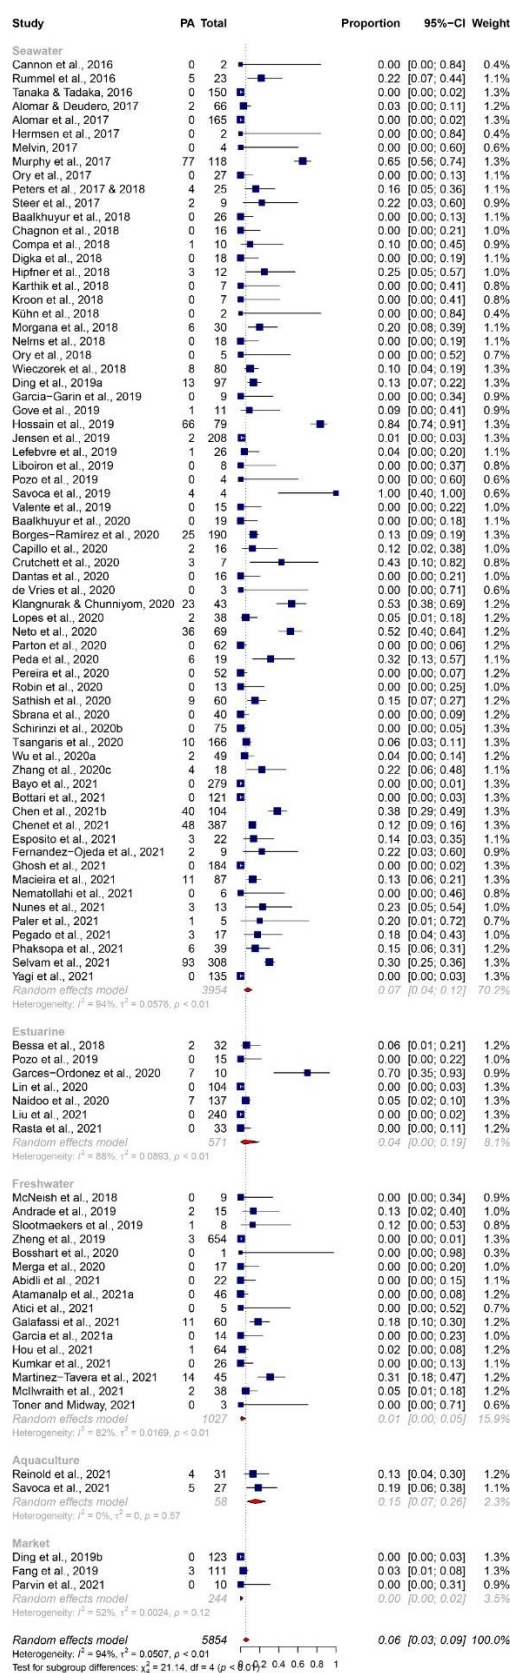

**Figure S15.** Forest plot for PA subgroup analysis. Red diamonds represent subgroup means. Total: total plastics found in each study. PA: number of PA found in each study. PA: Polyamide.
